# Supplementary material for: Simultaneous quantification of blood rheology and oxygen saturation to evaluate affinity-modifying therapies in sickle cell disease
Source: Royal Society of Chemistry journal article supplement (doi:10.1039/d2lc00623e), 2022-01-01
Supplement: d2lc00623e1.pdf [file d2lc00623e1.pdf]

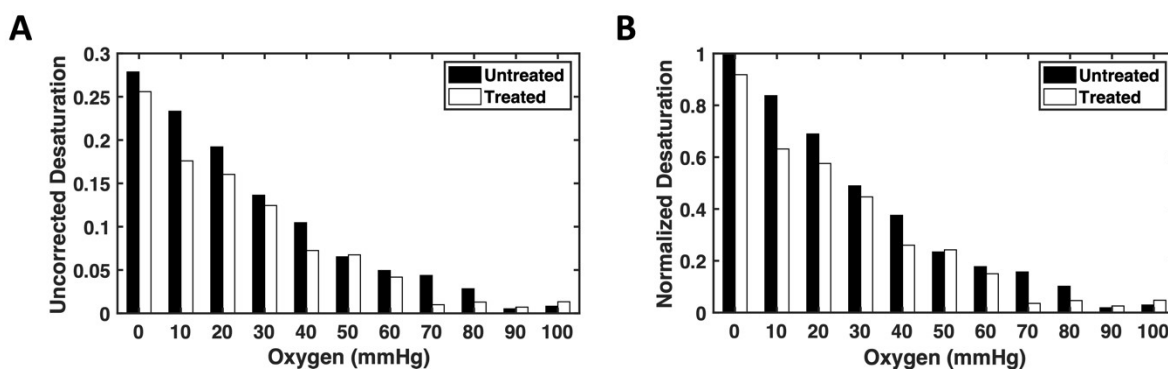

**Supplemental Figure S1: Hb-O<sub>2</sub> saturation normalization scheme.** (A) Change in the Hb-O<sub>2</sub> saturation output from Equation 5 for untreated samples (black) and samples incubated with 500uM Voxelotor for 1 hour (white). (B) The change in the uncorrected fractional desaturation during the transition from 160mmHg to 0mmHg was assumed to represent 100% desaturation in the untreated sample. Both the untreated and treated responses were normalized against this maximum signal change to obtain the outputs shown in Figure 3C.

**Supplemental Table S1: Blood Sample Characteristics.** Values labeled “N/A” were not measured.

| Sample ID  | Genotype                | Gender | HbS  | HbF  | HbA  | HbA2 | HCT  | MCV  | MCHC | WBC   | Transfusion | Hydroxyurea |
|------------|-------------------------|--------|------|------|------|------|------|------|------|-------|-------------|-------------|
| Sample #1  | HbSC                    | M      | N/A  | N/A  | N/A  | N/A  | 35.4 | 60   | 33.9 | 10.5  | N           | N           |
| Sample #2  | HbSS                    | M      | 75.9 | 21.4 | 0    | 2.7  | 23.8 | 91   | 35.3 | 10.5  | N           | Y           |
| Sample #3  | HbSS                    | M      | 33.9 | 8.9  | 54.3 | 2.5  | 28.9 | 86   | 35.6 | 15.6  | Y           | Y           |
| Sample #4  | HbS/β <sup>+</sup> Thal | M      | 69.7 | 6.1  | 18.9 | 5.3  | 31   | 69   | 34.5 | 4.8   | N           | N           |
| Sample #5  | HbSS                    | N/A    | N/A  | N/A  | N/A  | N/A  | N/A  | N/A  | N/A  | N/A   | N/A         | N/A         |
| Sample #6  | HbSS                    | F      | 63.5 | 34.4 | 0    | 2.1  | 26.7 | 85   | 34.5 | 14.8  | N           | Y           |
| Sample #7  | HbSS                    | F      | 80   | 17   | 0    | 3    | 15.9 | 92   | 36.5 | 9.8   | N           | Y           |
| Sample #8  | HbAA                    | F      | 0    | 0    | 97.7 | 2.3  | 41.3 | 91.8 | 32.2 | 6.33  | N           | N           |
| Sample #9  | HbAA                    | M      | 0    | 0    | 97.9 | 2.1  | 48.2 | 94.3 | 32.6 | 4.6   | N           | N           |
| Sample #10 | HbAA                    | M      | 0    | 0    | 97.4 | 2.6  | 44.6 | 98.2 | 32.5 | 10.43 | N           | N           |
| Sample #11 | HbAA                    | M      | 0    | 0    | 97.4 | 2.6  | 46.6 | 92.5 | 32.8 | 5.42  | N           | N           |

**Supplemental Table S2: Fitting Oxygen Binding Curves.**

| Sample ID                           | Hill Equation Fitting |          | 2 <sup>nd</sup> Order Polynomial Fitting |          |
|-------------------------------------|-----------------------|----------|------------------------------------------|----------|
|                                     | p50 (mmHg) ± 95% CI   | R-Square | p50 (mmHg)                               | R-Square |
| Sample #1 (HbSC)                    | 40.99 ± 0.8842        | 0.9988   | 41.45                                    | 0.9688   |
| Sample #2 (HbSS)                    | 33.71 ± 1.3354        | 0.9972   | 33.88                                    | 0.9849   |
| Sample #3 (HbSS)                    | 35.82 ± 2.4266        | 0.9917   | 37.38                                    | 0.9927   |
| Sample #4 (HbS/β <sup>+</sup> Thal) | 38.56 ± 2.3967        | 0.9915   | 39.14                                    | 0.9806   |
| Sample #5 (HbSS)                    | 28.00 ± 3.4561        | 0.9802   | 29.91                                    | 0.9852   |
| Sample #6 (HbSS)                    | 28.83 ± 2.5496        | 0.9892   | 30.66                                    | 0.9943   |
| Sample #7 (HbSS)                    | 34.02 ± 1.8693        | 0.9944   | 34.39                                    | 0.9846   |
| Sample #8 (HbAA)                    | 35.00 ± 1.3153        | 0.9974   | 35.42                                    | 0.9825   |
| Sample #9 (HbAA)                    | 31.80 ± 2.2165        | 0.9926   | 33.18                                    | 0.9884   |
| Sample #10 (HbAA)                   | 29.27 ± 1.5609        | 0.9960   | 30.67                                    | 0.9949   |
| Sample #11 (HbAA)                   | 22.57 ± 1.8805        | 0.9928   | 25.00                                    | 0.9872   |
